# Supplementary material for: Magnetic carbon nanotubes for self-regulating temperature hyperthermia
Source: Royal Society of Chemistry journal article supplement (doi:10.1039/c7ra13256e), 2018-01-01
Supplement: c7ra13256e1.pdf [file c7ra13256e1.pdf]

## Supporting Information

# Magnetic carbon nanotubes for self-regulating temperature hyperthermia †

Xudong Zuo,<sup>a</sup> Chengwei Wu,<sup>a</sup> Wei Zhang <sup>\*a</sup> and Wei Gao<sup>b</sup>

**Table 1s** The theoretical and measured element ratios of MNPs and MCNTs

| Sample name  | Theoretical molar ratio<br>(Zn:Co:Cr:Fe) | Measured molar ratio<br>(Zn:Co:Cr:Fe) |
|--------------|------------------------------------------|---------------------------------------|
| <i>MNPs</i>  | 0.54:0.46:0.6:1.4                        | 0.539:0.461:0.54:1.46                 |
| <i>MCNTs</i> | 0.54:0.46:0.6:1.4                        | 0.545:0.455:0.56:1.44                 |

---

<sup>a</sup>State Key Laboratory of Structural Analysis for Industrial Equipment, Department of Engineering Mechanics, Dalian University of Technology, Dalian 116024, P. R. China.  
Email: wei.zhang@dlut.edu.cn

<sup>b</sup>Department of Chemical and Materials Engineering, the University of Auckland, Auckland 1142, New Zealand.

† Electronic supplementary information available: Table S1-The theoretical and measured element ratios of MNPs and MCNTs, Figure S1- UV-vis spectra of MNPs and MCNTs aqueous solution at the moment of dispersion and after 12 h.



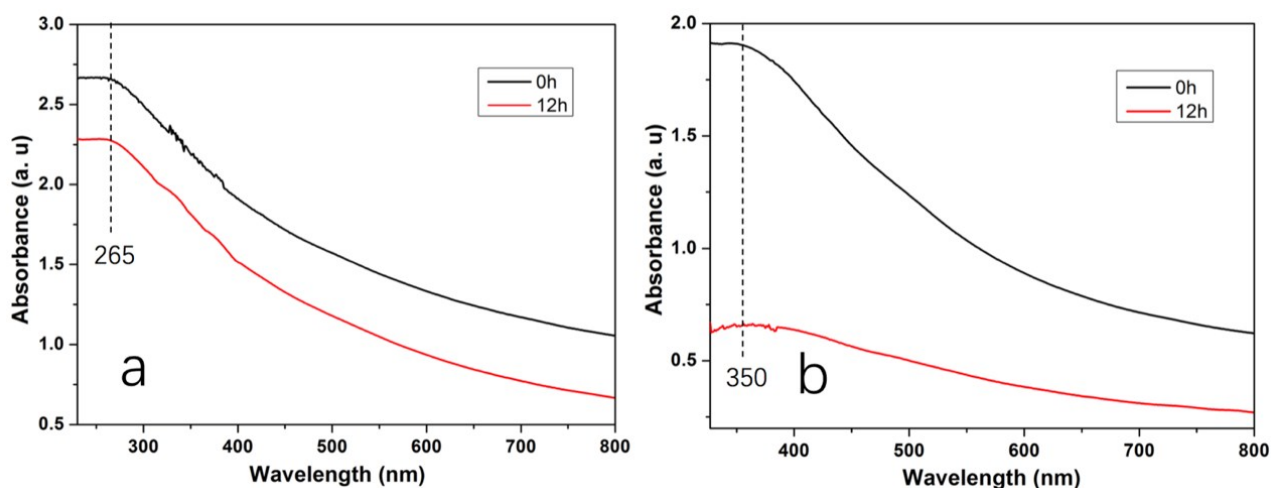

**Figure 1s** (a) UV-vis spectra of MCNTs aqueous solution at the moment of dispersion and after 12 h; (b) UV-vis spectra of MNPs aqueous solution at the moment of dispersion and after 12 h.
